# Supplementary material for: Selphi: Empowering GWAS Discovery through Enhanced Genotype Imputation
Source: bioRxiv or medRxiv preprint supplement (doi:10.1101/2023.12.18.23300143), 2026-01-29
Supplement: Supplementary file [file media-1.pdf]

# Supplementary Material

## Supplementary Figures

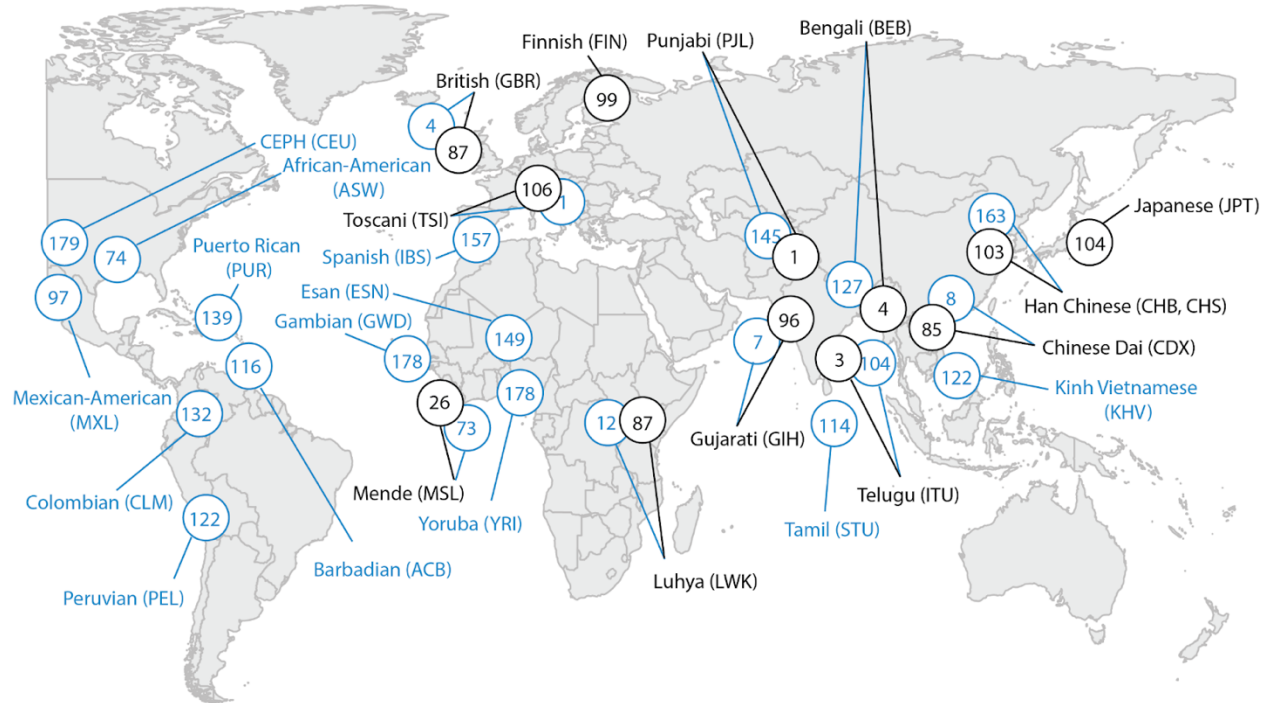

**Supplementary Fig. 1** | Samples used as imputation targets (black) and reference (blue) in the 1000 Genomes 30x Dataset.

## Supplementary Tables

**Supplementary Table 1. Overall imputation accuracy in the 1KG, TOPMed and UK Biobank dataset for Beagle5.4, Minimac4, IMPUTE5 and Selphi.**

| <b>Method</b>    | <b>Sum error</b> | <b>P0</b> | <b>R2</b> | <b>F-score</b> | <b>Dataset (N)</b> |
|------------------|------------------|-----------|-----------|----------------|--------------------|
| <b>Selphi</b>    | 300826681        | 0.99451   | 0.95196   | 0.9973         | 1KG (801)          |
| <b>Beagle5.4</b> | 324516831        | 0.99407   | 0.94834   | 0.9971         |                    |
| <b>IMPUTE5</b>   | 336514775        | 0.99386   | 0.94648   | 0.9970         |                    |
| <b>Minimac4</b>  | 343309686        | 0.99376   | 0.94469   | 0.9969         |                    |
| <b>Selphi</b>    | 169093080        | 0.99870   | 0.81106   | 0.9991         | TOPMed (5,000)     |
| <b>Beagle5.4</b> | 185309357        | 0.99851   | 0.79708   | 0.9990         |                    |
| <b>IMPUTE5</b>   | 187626533        | 0.99849   | 0.79557   | 0.9990         |                    |
| <b>Minimac4</b>  | 198005705        | 0.99841   | 0.78776   | 0.9989         |                    |
| <b>Selphi</b>    | 9393488241       | 0.99780   | 0.97912   | 0.9999         | UKB (50,000)       |
| <b>Beagle5.4</b> | 11878351998      | 0.99774   | 0.97381   | 0.9998         |                    |

**Supplementary Table 2. Imputation accuracy for different MAF intervals in the 1KG dataset for Beagle5.4, Minimac4, IMPUTE5 and Selphi.**

| MAF (%)           | Method    | Sum error | Mean error | Variants | P0     | R2     | F-score |
|-------------------|-----------|-----------|------------|----------|--------|--------|---------|
| <b>0.05 - 0.1</b> | Selphi    | 6598303   | 0.7331     | 8999974  | 0.9991 | 0.0775 | 0.9995  |
|                   | Beagle5.4 | 8049474   | 0.8944     | 8999974  | 0.9989 | 0.1077 | 0.9994  |
|                   | Minimac4  | 7398909   | 0.8221     | 8999974  | 0.9990 | 0.0994 | 0.9995  |
|                   | IMPUTE5   | 8486635   | 0.9430     | 8999974  | 0.9988 | 0.1081 | 0.9994  |
| <b>0.1 - 0.2</b>  | Selphi    | 10617239  | 1.3736     | 7729390  | 0.9983 | 0.1818 | 0.9991  |
|                   | Beagle5.4 | 12007756  | 1.5535     | 7729390  | 0.9981 | 0.2216 | 0.9990  |
|                   | Minimac4  | 11276290  | 1.4589     | 7729390  | 0.9981 | 0.2085 | 0.9991  |
|                   | IMPUTE5   | 12571856  | 1.6265     | 7729390  | 0.9980 | 0.2205 | 0.9990  |
| <b>0.2 - 0.5</b>  | Selphi    | 17378413  | 2.4423     | 7115603  | 0.9970 | 0.3729 | 0.9985  |
|                   | Beagle5.4 | 19137117  | 2.6894     | 7115603  | 0.9967 | 0.3971 | 0.9983  |
|                   | Minimac4  | 18326241  | 2.5755     | 7115603  | 0.9968 | 0.3830 | 0.9984  |
|                   | IMPUTE5   | 19959034  | 2.8050     | 7115603  | 0.9965 | 0.3928 | 0.9983  |
| <b>0.5 - 1</b>    | Selphi    | 15419809  | 3.8176     | 4039109  | 0.9953 | 0.5465 | 0.9976  |
|                   | Beagle5.4 | 16991224  | 4.2067     | 4039109  | 0.9948 | 0.5472 | 0.9974  |
|                   | Minimac4  | 16492572  | 4.0832     | 4039109  | 0.9950 | 0.5373 | 0.9975  |
|                   | IMPUTE5   | 17660234  | 4.3723     | 4039109  | 0.9946 | 0.5421 | 0.9973  |
| <b>1 - 2</b>      | Selphi    | 18996525  | 5.7424     | 3308106  | 0.9929 | 0.6370 | 0.9965  |
|                   | Beagle5.4 | 20902705  | 6.3186     | 3308106  | 0.9922 | 0.6307 | 0.9961  |
|                   | Minimac4  | 20603432  | 6.2282     | 3308106  | 0.9923 | 0.6202 | 0.9962  |
|                   | IMPUTE5   | 21665033  | 6.5491     | 3308106  | 0.9919 | 0.6253 | 0.9960  |
| <b>2 - 5</b>      | Selphi    | 30015434  | 9.1326     | 3286632  | 0.9888 | 0.7325 | 0.9945  |
|                   | Beagle5.4 | 32578779  | 9.9125     | 3286632  | 0.9878 | 0.7248 | 0.9941  |
|                   | Minimac4  | 33393736  | 10.1605    | 3286632  | 0.9876 | 0.7098 | 0.9940  |
|                   | IMPUTE5   | 33730514  | 10.2629    | 3286632  | 0.9874 | 0.7197 | 0.9939  |
| <b>5 - 10</b>     | Selphi    | 29536778  | 14.8988    | 1982490  | 0.9818 | 0.8337 | 0.9916  |
|                   | Beagle5.4 | 31634330  | 15.9569    | 1982490  | 0.9805 | 0.8273 | 0.9910  |
|                   | Minimac4  | 33777032  | 17.0377    | 1982490  | 0.9792 | 0.8120 | 0.9904  |
|                   | IMPUTE5   | 32777685  | 16.5336    | 1982490  | 0.9798 | 0.8230 | 0.9907  |
| <b>10 - 20</b>    | Selphi    | 46527577  | 22.0513    | 2109968  | 0.9731 | 0.8909 | 0.9886  |
|                   | Beagle5.4 | 49394567  | 23.4101    | 2109968  | 0.9714 | 0.8861 | 0.9880  |
|                   | Minimac4  | 54381112  | 25.7734    | 2109968  | 0.9687 | 0.8734 | 0.9867  |
|                   | IMPUTE5   | 51200934  | 24.2662    | 2109968  | 0.9704 | 0.8828 | 0.9876  |
| <b>20 - 50</b>    | Selphi    | 105532014 | 28.5553    | 3695701  | 0.9654 | 0.9248 | 0.9871  |
|                   | Beagle5.4 | 110892254 | 30.0057    | 3695701  | 0.9636 | 0.9211 | 0.9865  |
|                   | Minimac4  | 125722639 | 34.0186    | 3695701  | 0.9591 | 0.9118 | 0.9846  |
|                   | IMPUTE5   | 114867683 | 31.0814    | 3695701  | 0.9623 | 0.9184 | 0.9861  |

**Supplementary Table 3. Imputation accuracy for different MAF intervals in the TOPMed dataset for Beagle5.4, IMPUTE5, Minimac4 and Selphi.**

| MAF (%)           | Method    | Sum error | Mean error | Variants | P0     | R2     | F-score |
|-------------------|-----------|-----------|------------|----------|--------|--------|---------|
| <b>0.05 - 0.1</b> | Selphi    | 815634    | 5.2200     | 156251   | 0.9994 | 0.3594 | 0.9995  |
|                   | Beagle5.4 | 970834    | 6.2133     | 156251   | 0.9993 | 0.3683 | 0.9994  |
|                   | IMPUTE5   | 999554    | 6.3971     | 156251   | 0.9993 | 0.3676 | 0.9994  |
|                   | Minimac4  | 1067481   | 6.8318     | 156251   | 0.9993 | 0.3578 | 0.9993  |
| <b>0.1 - 0.2</b>  | Selphi    | 1124191   | 9.0146     | 124707   | 0.9991 | 0.4164 | 0.9991  |
|                   | Beagle5.4 | 1355363   | 10.8684    | 124707   | 0.9988 | 0.4154 | 0.9989  |
|                   | IMPUTE5   | 1391653   | 11.1594    | 124707   | 0.9988 | 0.4146 | 0.9989  |
|                   | Minimac4  | 1489211   | 11.9417    | 124707   | 0.9987 | 0.4025 | 0.9988  |
| <b>0.2 - 0.5</b>  | Selphi    | 2396118   | 17.2333    | 139040   | 0.9982 | 0.4808 | 0.9983  |
|                   | Beagle5.4 | 2917884   | 20.9859    | 139040   | 0.9978 | 0.4743 | 0.9979  |
|                   | IMPUTE5   | 3003702   | 21.6032    | 139040   | 0.9977 | 0.4720 | 0.9978  |
|                   | Minimac4  | 3239915   | 23.3020    | 139040   | 0.9975 | 0.4571 | 0.9977  |
| <b>0.5 - 1</b>    | Selphi    | 3078075   | 33.7323    | 91250    | 0.9964 | 0.5355 | 0.9967  |
|                   | Beagle5.4 | 3775645   | 41.3769    | 91250    | 0.9956 | 0.5268 | 0.9959  |
|                   | IMPUTE5   | 3887404   | 42.6017    | 91250    | 0.9954 | 0.5243 | 0.9958  |
|                   | Minimac4  | 4235933   | 46.4212    | 91250    | 0.9950 | 0.5055 | 0.9954  |
| <b>1 - 2</b>      | Selphi    | 5050647   | 64.3190    | 78525    | 0.9931 | 0.5612 | 0.9937  |
|                   | Beagle5.4 | 6227147   | 79.3014    | 78525    | 0.9914 | 0.5527 | 0.9923  |
|                   | IMPUTE5   | 6398597   | 81.4848    | 78525    | 0.9911 | 0.5508 | 0.9920  |
|                   | Minimac4  | 6966310   | 88.7145    | 78525    | 0.9902 | 0.5320 | 0.9914  |
| <b>2 - 5</b>      | Selphi    | 10560295  | 136.8357   | 77175    | 0.9853 | 0.5727 | 0.9870  |
|                   | Beagle5.4 | 13021888  | 168.7319   | 77175    | 0.9815 | 0.5646 | 0.9840  |
|                   | IMPUTE5   | 13395608  | 173.5744   | 77175    | 0.9808 | 0.5629 | 0.9835  |
|                   | Minimac4  | 14541236  | 188.4190   | 77175    | 0.9791 | 0.5453 | 0.9822  |
| <b>5 - 10</b>     | Selphi    | 13591477  | 280.8272   | 48398    | 0.9692 | 0.5953 | 0.9743  |
|                   | Beagle5.4 | 16480263  | 340.5153   | 48398    | 0.9614 | 0.5863 | 0.9694  |
|                   | IMPUTE5   | 16908940  | 349.3727   | 48398    | 0.9602 | 0.5848 | 0.9686  |
|                   | Minimac4  | 18217330  | 376.4067   | 48398    | 0.9570 | 0.5684 | 0.9663  |
| <b>10 - 20</b>    | Selphi    | 23206974  | 463.7407   | 50043    | 0.9463 | 0.6622 | 0.9608  |
|                   | Beagle5.4 | 26834050  | 536.2198   | 50043    | 0.9351 | 0.6508 | 0.9560  |
|                   | IMPUTE5   | 27376943  | 547.0684   | 50043    | 0.9334 | 0.6491 | 0.9552  |
|                   | Minimac4  | 29340482  | 586.3054   | 50043    | 0.9284 | 0.6313 | 0.9523  |
| <b>20 - 50</b>    | Selphi    | 106154687 | 1004.1497  | 105716   | 0.8380 | 0.6073 | 0.9348  |
|                   | Beagle5.4 | 109992405 | 1040.4518  | 105716   | 0.8291 | 0.5956 | 0.9334  |
|                   | IMPUTE5   | 110392171 | 1044.2333  | 105716   | 0.8276 | 0.5934 | 0.9333  |
|                   | Minimac4  | 114805306 | 1085.9785  | 105716   | 0.8223 | 0.5776 | 0.9304  |

**Supplementary Table 4. Imputation accuracy for different MAF intervals in the UK Biobank dataset for Beagle5.4 and Selphi.**

| <b>MAF (%)</b>    | <b>Method</b> | <b>Sum error</b> | <b>Mean error</b> | <b>Variants</b> | <b>P0</b> | <b>R2</b> | <b>F-score</b> |
|-------------------|---------------|------------------|-------------------|-----------------|-----------|-----------|----------------|
| <b>0.05 - 0.1</b> | Selphi        | 195241576        | 34.39620144       | 5676254         | 0.9996    | 0.1059    | 0.9996         |
|                   | Beagle5.4     | 224017164        | 39.46566944       | 5676254         | 0.9995    | 0.1339    | 0.9996         |
| <b>0.1 - 0.2</b>  | Selphi        | 258188230        | 62.03295489       | 4162114         | 0.9991    | 0.2015    | 0.9994         |
|                   | Beagle5.4     | 289180242        | 69.4791738        | 4162114         | 0.9990    | 0.2320    | 0.9993         |
| <b>0.2 - 0.5</b>  | Selphi        | 485746254        | 132.2627309       | 3672586         | 0.9977    | 0.3697    | 0.9987         |
|                   | Beagle5.4     | 536055465        | 145.9613104       | 3672586         | 0.9974    | 0.3861    | 0.9985         |
| <b>0.5 - 1</b>    | Selphi        | 474402503        | 260.0186698       | 1824494         | 0.9936    | 0.5789    | 0.9974         |
|                   | Beagle5.4     | 535200676        | 293.3419765       | 1824494         | 0.9930    | 0.5692    | 0.9971         |
| <b>1 - 2</b>      | Selphi        | 538887052        | 360.4586021       | 1495004         | 0.9860    | 0.7371    | 0.9965         |
|                   | Beagle5.4     | 631961022        | 422.7152717       | 1495004         | 0.9851    | 0.7142    | 0.9959         |
| <b>2 - 5</b>      | Selphi        | 826383016        | 439.0504839       | 1882205         | 0.9684    | 0.8577    | 0.9958         |
|                   | Beagle5.4     | 1018628896       | 541.1891351       | 1882205         | 0.9673    | 0.8341    | 0.9949         |
| <b>5 - 10</b>     | Selphi        | 893364496        | 574.1557287       | 1555962         | 0.9324    | 0.9155    | 0.9949         |
|                   | Beagle5.4     | 1129592078       | 725.9766485       | 1555962         | 0.9311    | 0.8966    | 0.9936         |
| <b>10 - 20</b>    | Selphi        | 1399944986       | 724.3714982       | 1932634         | 0.8742    | 0.9430    | 0.9941         |
|                   | Beagle5.4     | 1814800220       | 939.0294386       | 1932634         | 0.8727    | 0.9271    | 0.9924         |
| <b>20 - 50</b>    | Selphi        | 3410133462       | 898.962059        | 3793412         | 0.7788    | 0.9597    | 0.9937         |
|                   | Beagle5.4     | 4549890356       | 1199.418981       | 3793412         | 0.7772    | 0.9464    | 0.9916         |

**Supplementary Table 5. TOPMed Studies and Consensus Groups** utilized for the construction of the TOPMed reference panel.

|    | <b>Study Name</b>     | <b>Study ID</b> | <b>Consensus Group</b> | <b>Consensus Code</b> | <b>Version</b> |
|----|-----------------------|-----------------|------------------------|-----------------------|----------------|
| 1  | AfricanAm Sarcoidosis | phs001207       | c1                     | DS-SAR-IRB            | v2.p1          |
| 2  | ARIC WholeGene        | phs001211       | c1                     | HMB-IRB               | v3.p2          |
| 3  | ARIC WholeGene        | phs001211       | c2                     | DS-CVD-IRB            | v3.p2          |
| 4  | Asthma Barbados       | phs001143       | c1                     | GRU-IRB               | v4.p1          |
| 5  | Asthma CostaRica      | phs000988       | c1                     | DS-ASTHMA-IRB-MDS-RD  | v5.p1          |
| 6  | BrazilSCD             | phs001468       | c1                     | GRU-IRB-PUB-NPU       | v1.p1          |
| 7  | CARDIA                | phs001612       | c1                     | HMB-IRB               | v1.p1          |
| 8  | CARDIA                | phs001612       | c2                     | HMB-IRB-NPU           | v1.p1          |
| 9  | CardioHealth          | phs001368       | c1                     | HMB-MDS               | v2.p2          |
| 10 | CardioHealth          | phs001368       | c2                     | HMB-NPU-MDS           | v2.p2          |
| 11 | CardioHealth          | phs001368       | c4                     | DS-CVD-NPU-MDS        | v2.p2          |
| 12 | CardioHealth Amish    | phs000956       | c2                     | HMB-IRB-MDS           | v4.p1          |
| 13 | Cleveland Family      | phs000954       | c1                     | DS-HLBS-IRB-NPU       | v3.p2          |
| 14 | Cleveland Afib        | phs001189       | c1                     | GRU-IRB               | v4.p1          |
| 15 | COPD                  | phs000951       | c1                     | HMB-MDS               | v4.p4          |
| 16 | CVHealth              | phs000993       | c2                     | DS-CVD-IRV-MDS        | v5.p2          |
| 17 | CVHealth              | phs000993       | c1                     | HMB-IRB-MDS           | v5.p2          |
| 18 | Framingham WholeGene  | phs000974       | c1                     | HMB-IRB-MDS           | v4.p3          |
| 19 | Framingham WholeGene  | phs000974       | c2                     | HMB-IRB-NPU-MDS       | v4.p3          |
| 20 | GeneSTAR              | phs001218       | c2                     | DS-CVD-IRB-NPU-MDS    | v2.p1          |
| 21 | GENOA                 | phs001345       | c1                     | DS-ASC-RF-NPU         | v2.p1          |
| 22 | GenSalt               | phs001217       | c1                     | DS-HCR-IRB            | v2.p1          |
| 23 | GOLDN                 | phs001359       | c1                     | DS-CVD-IRB            | v3.p1          |
| 24 | HCHS SOL              | phs001395       | c1                     | HMB-NPU               | v2.p1          |
| 25 | HCHS SOL              | phs001395       | c2                     | HMB                   | v2.p1          |

|    |                            |           |    |                       |       |
|----|----------------------------|-----------|----|-----------------------|-------|
| 26 | HyperGEN                   | phs001293 | c1 | GRU-IRB               | v2.p1 |
| 27 | HyperGEN                   | phs001293 | c2 | DS-CVD-IRB-RD         | v2.p1 |
| 28 | Jackson Heart              | phs000964 | c1 | HMB-IRB-NPU           | v4.p1 |
| 29 | Jackson Heart              | phs000964 | c2 | DS-FDO-IRB-NPU        | v4.p1 |
| 30 | Jackson Heart              | phs000964 | c3 | HMB-IRB               | v4.p1 |
| 31 | Jackson Heart              | phs000964 | c4 | DS-FDO-IRB            | v4.p1 |
| 32 | MESA                       | phs001416 | c1 | HMB                   | v2.p1 |
| 33 | MESA                       | phs001416 | c2 | HMB-NPU               | v2.p1 |
| 34 | MGH Afib                   | phs001062 | c1 | HMB-IRB               | v5.p2 |
| 35 | MGH Afib                   | phs001062 | c2 | DS-AF-IRB-RD          | v5.p2 |
| 36 | MyLifeOurFuture Hemophilia | phs001515 | c1 | HMB-PUB               | v2.p2 |
| 37 | Novel Risk Afib Women      | phs001040 | c1 | HMB                   | v5.p1 |
| 38 | Partners HCBiobank         | phs001024 | c1 | HMB                   | v4.p1 |
| 39 | PharmHU                    | phs001466 | c1 | HMB                   | v1.p1 |
| 40 | PharmHU                    | phs001466 | c2 | DS-SCD-RD             | v1.p1 |
| 41 | PharmHU                    | phs001466 | c3 | DS-SCD                | v1.p1 |
| 42 | SAFHS CVD                  | phs001215 | c1 | DS-DHD-IRB-PUB-MDS-RD | v3.p2 |
| 43 | SARP                       | phs001446 | c1 | GRU                   | v1.p1 |
| 44 | Vanderbilt AFablation      | phs000997 | c1 | HMB-IRB               | v4.p2 |
| 45 | Vanderbilt Afib            | phs001032 | c1 | GRU-IRB               | v6.p2 |
| 46 | Venous Throm               | phs001402 | c1 | GRU                   | v3.p1 |
| 47 | WHI                        | phs001237 | c1 | HMB-IRB               | v2.p1 |
| 48 | WHI                        | phs001237 | c2 | HMB-IRB-NPU           | v2.p1 |

---

**Supplementary Table 6. Reference and Target Markers across datasets.** Number of reference and target markers for each chromosome in our benchmarking panel obtained from the 1000 Genomes Project (1KG) Dataset and UK Biobank.

| Chr | 1000 Genomes Project |        | TOPMed     |        | UK Biobank |        |
|-----|----------------------|--------|------------|--------|------------|--------|
|     | Reference            | Target | Reference  | Target | Reference  | Target |
| 1   | 5,769,087            | 49,977 | /          | /      | 48,448,838 | 53,087 |
| 2   | 6,095,976            | 52,869 | /          | /      | 50,617,221 | 52,599 |
| 3   | 4,986,824            | 43,376 | /          | /      | 43,235,013 | 44,223 |
| 4   | 4,878,537            | 40,435 | /          | /      | 39,818,105 | 41,193 |
| 5   | 4,539,890            | 37,574 | /          | /      | 36,802,991 | 38,728 |
| 6   | 4,317,093            | 45,433 | /          | /      | 35,576,415 | 45,844 |
| 7   | 4,140,924            | 34,937 | /          | /      | 35,081,174 | 35,910 |
| 8   | 3,888,893            | 32,669 | /          | /      | 33,856,820 | 33,628 |
| 9   | 3,169,328            | 26,871 | /          | /      | 26,935,065 | 29,101 |
| 10  | 3,499,286            | 31,064 | /          | /      | 29,351,162 | 32,610 |
| 11  | 3,425,446            | 31,148 | /          | /      | 29,825,047 | 33,110 |
| 12  | 3,335,036            | 30,267 | /          | /      | 28,658,800 | 31,413 |
| 13  | 2,512,948            | 22,288 | /          | /      | 21,123,329 | 22,131 |
| 14  | 2,294,933            | 19,904 | /          | /      | 19,395,462 | 21,192 |
| 15  | 2,111,611            | 19,197 | /          | /      | 17,802,705 | 20,846 |
| 16  | 2,366,114            | 20,815 | /          | /      | 19,960,418 | 23,773 |
| 17  | 2,075,523            | 18,196 | /          | /      | 17,334,935 | 22,032 |
| 18  | 1,965,907            | 18,085 | /          | /      | 16,663,631 | 19,243 |
| 19  | 1,672,929            | 14,481 | /          | /      | 13,181,709 | 18,934 |
| 20  | 1,647,102            | 15,171 | 17,900,635 | 15,365 | 13,780,208 | 17,180 |
| 21  | 1,004,437            | 8,521  | /          | /      | 7,949,357  | 9,785  |
| 22  | 1,070,401            | 9,283  | /          | /      | 8,255,855  | 10,792 |



**Supplementary Table 7. Phenotypic traits used in GWAS analysis.** QT = quantitative trait, Disease = binary trait.

| <b>Trait</b>                                          | <b>Code</b> | <b>Type</b> |
|-------------------------------------------------------|-------------|-------------|
| Age at menopause                                      | AAM         | QT          |
| Apolipoprotein A1                                     | APOEA       | QT          |
| Apolipoprotein B                                      | APOEB       | QT          |
| Body mass index                                       | BMI         | QT          |
| Calcium                                               | CAL         | QT          |
| Docosahexaenoic acid                                  | DOA         | QT          |
| Glycated hemoglobin                                   | HBA1C       | QT          |
| High density lipoprotein cholesterol                  | HDL         | QT          |
| Height                                                | HEIGHT      | QT          |
| Intraocular pressure                                  | IOP         | QT          |
| Low density lipoprotein cholesterol                   | LDL         | QT          |
| Omega-6 fatty acids                                   | OSFA        | QT          |
| Omega-3 fatty acids                                   | OTFA        | QT          |
| Phosphatidylcholines                                  | PDCL        | QT          |
| Polyunsaturated fatty acids                           | PFA         | QT          |
| Phosphoglycerides                                     | PHG         | QT          |
| Resting heart rate                                    | RHR         | QT          |
| Remnant cholesterol (Non-HDL and Non-LDL cholesterol) | RMNC        | QT          |
| Sphingomyelins                                        | SGM         | QT          |
| Total cholesterol                                     | TCH         | QT          |
| Total fatty acids                                     | TFA         | QT          |
| Total triglycerides                                   | TTG         | QT          |
| Alzheimer's disease                                   | AD          | Disease     |
| Atrial fibrillation                                   | AF          | Disease     |
| Age-related macular degeneration                      | AMD         | Disease     |
| Asthma                                                | AST         | Disease     |
| Breast cancer                                         | BC          | Disease     |

|                                      |             |                |
|--------------------------------------|-------------|----------------|
| <b>Bipolar disorder</b>              | <b>BD</b>   | <b>Disease</b> |
| <b>Coronary artery disease</b>       | <b>CAD</b>  | <b>Disease</b> |
| <b>Crohn's disease</b>               | <b>CD</b>   | <b>Disease</b> |
| <b>Coeliac disease</b>               | <b>CED</b>  | <b>Disease</b> |
| <b>Bowel cancer</b>                  | <b>CRC</b>  | <b>Disease</b> |
| <b>Cardiovascular disease</b>        | <b>CVD</b>  | <b>Disease</b> |
| <b>Epithelial ovarian cancer</b>     | <b>EOC</b>  | <b>Disease</b> |
| <b>Hypertension</b>                  | <b>HT</b>   | <b>Disease</b> |
| <b>Ischaemic stroke</b>              | <b>ISS</b>  | <b>Disease</b> |
| <b>Melanoma</b>                      | <b>MEL</b>  | <b>Disease</b> |
| <b>Multiple sclerosis</b>            | <b>MS</b>   | <b>Disease</b> |
| <b>Osteoporosis</b>                  | <b>OP</b>   | <b>Disease</b> |
| <b>Prostate cancer</b>               | <b>PC</b>   | <b>Disease</b> |
| <b>Parkinson's disease</b>           | <b>PD</b>   | <b>Disease</b> |
| <b>Primary open angle glaucoma</b>   | <b>POAG</b> | <b>Disease</b> |
| <b>Psoriasis</b>                     | <b>PSO</b>  | <b>Disease</b> |
| <b>Rheumatoid arthritis</b>          | <b>RA</b>   | <b>Disease</b> |
| <b>Schizophrenia</b>                 | <b>SCZ</b>  | <b>Disease</b> |
| <b>Systemic lupus erythematosus</b>  | <b>SLE</b>  | <b>Disease</b> |
| <b>Type 1 diabetes</b>               | <b>T1D</b>  | <b>Disease</b> |
| <b>Type 2 diabetes</b>               | <b>T2D</b>  | <b>Disease</b> |
| <b>Ulcerative colitis</b>            | <b>UC</b>   | <b>Disease</b> |
| <b>Venous thromboembolic disease</b> | <b>VTE</b>  | <b>Disease</b> |

**Supplementary Table 8.** Studies used for GWAS meta-analysis for each phenotype in PRS analysis.

| <b>Trait</b>        | <b>Studies</b>                                                                                                                                        |
|---------------------|-------------------------------------------------------------------------------------------------------------------------------------------------------|
| Height              | <a href="#">Yengo et al. 2022</a>                                                                                                                     |
| Calcium             | <a href="#">Dennis et al. 2021</a> , <a href="#">Sakaue et al. 2021</a>                                                                               |
| Atrial fibrillation | <a href="#">Christophersen et al. 2017</a> , <a href="#">Sakaue et al. 2021</a> , <a href="#">Kurki et al. 2023</a>                                   |
| Asthma              | <a href="#">Demenais et al. 2018</a> , <a href="#">Sakaue et al. 2021</a> , <a href="#">Kurki et al. 2023</a>                                         |
| Apolipoprotein B    | <a href="#">Kettunen et al. 2016</a> , <a href="#">Sun et al. 2018</a> , <a href="#">Gudjonsson et al. 2022</a> , <a href="#">Thareja et al. 2023</a> |
| Hypertension        | <a href="#">Wojcik et al. 2019</a> , <a href="#">Kurki et al. 2023</a>                                                                                |
| Type 2 diabetes     | <a href="#">Wojcik et al. 2019</a> , <a href="#">Vujkovic et al. 2020</a> , <a href="#">Kurki et al. 2023</a>                                         |
